# Supplementary material for: Oral microbiota and periodontitis severity among Hispanic adults
Source: PubMed Central journal article supplement (PMC9703052; doi:10.3389/fcimb.2022.965159), 2022-11-14

A)

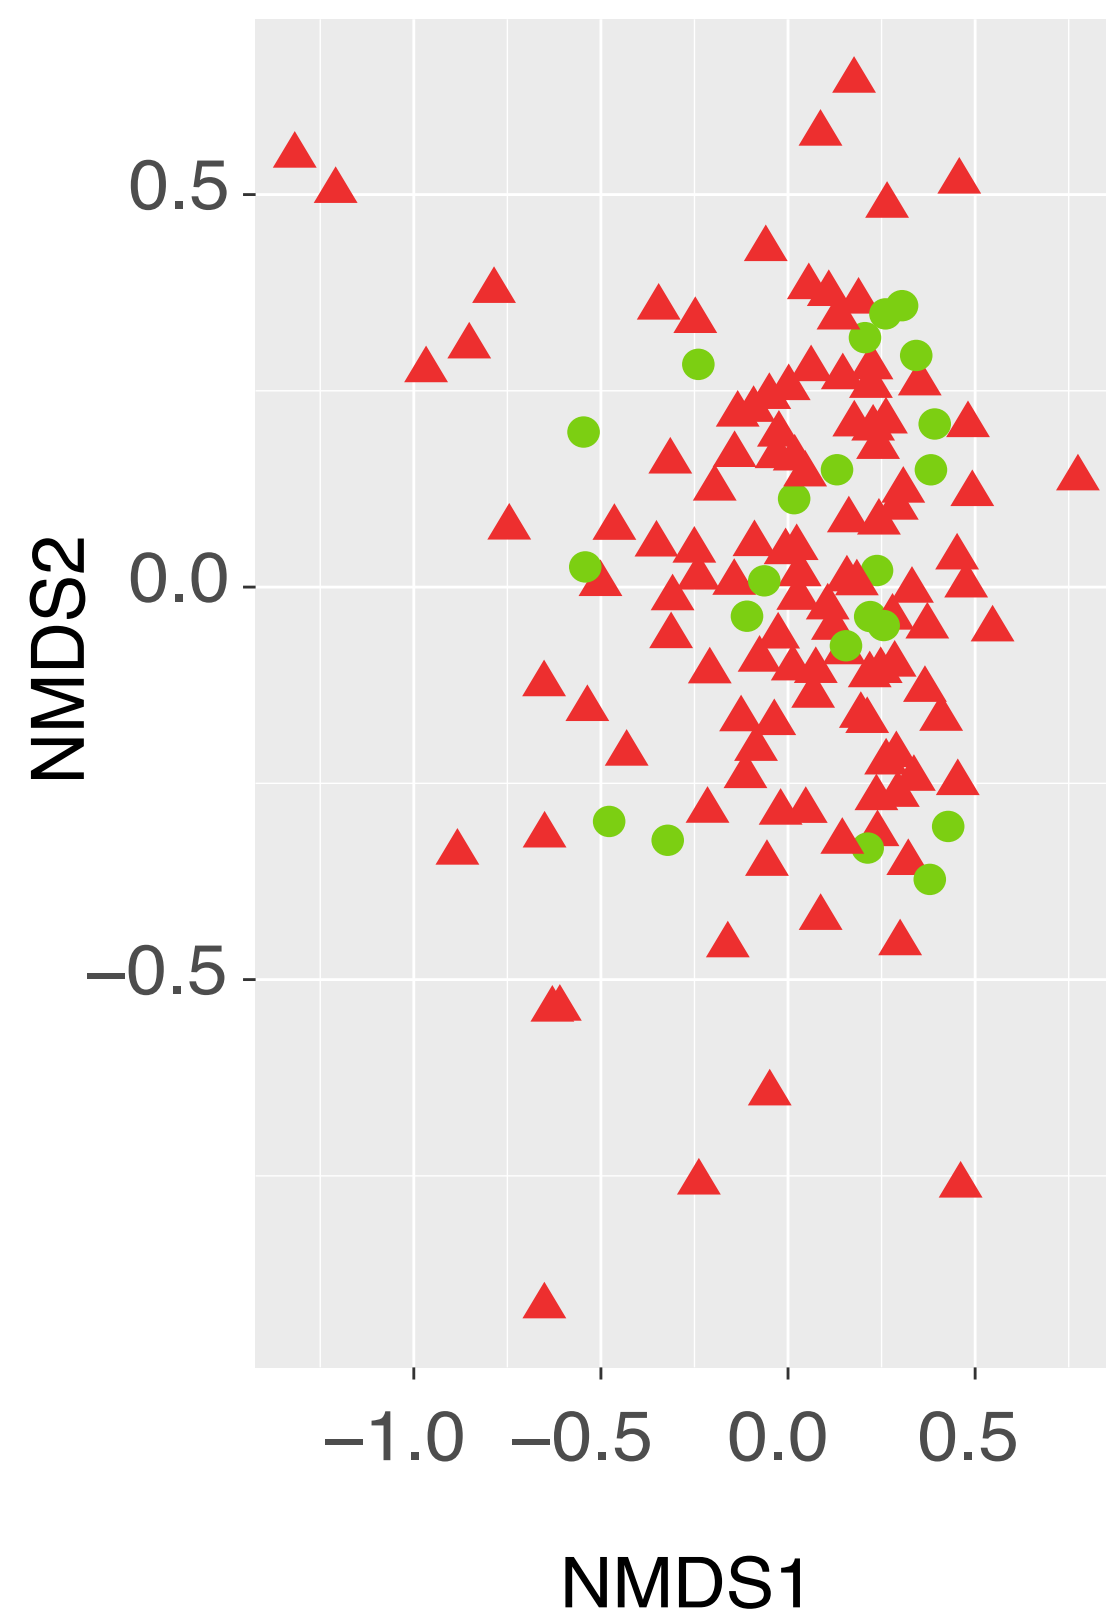

B)

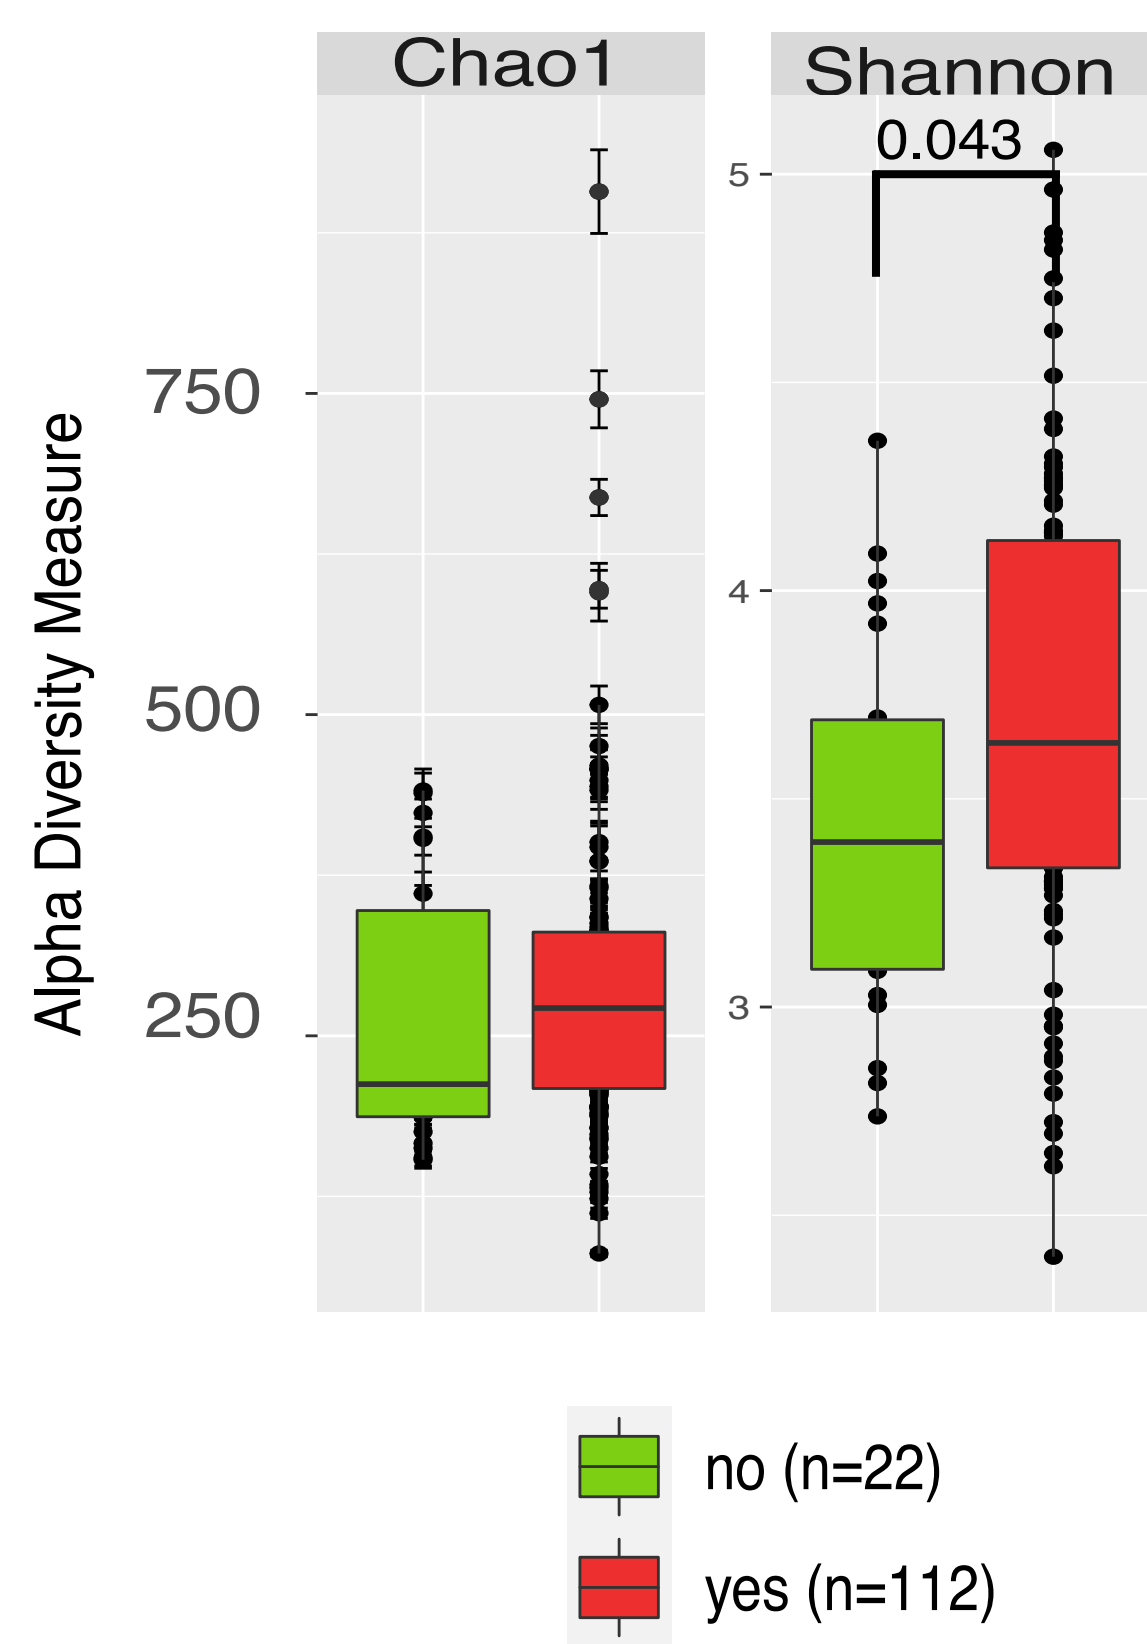

C)

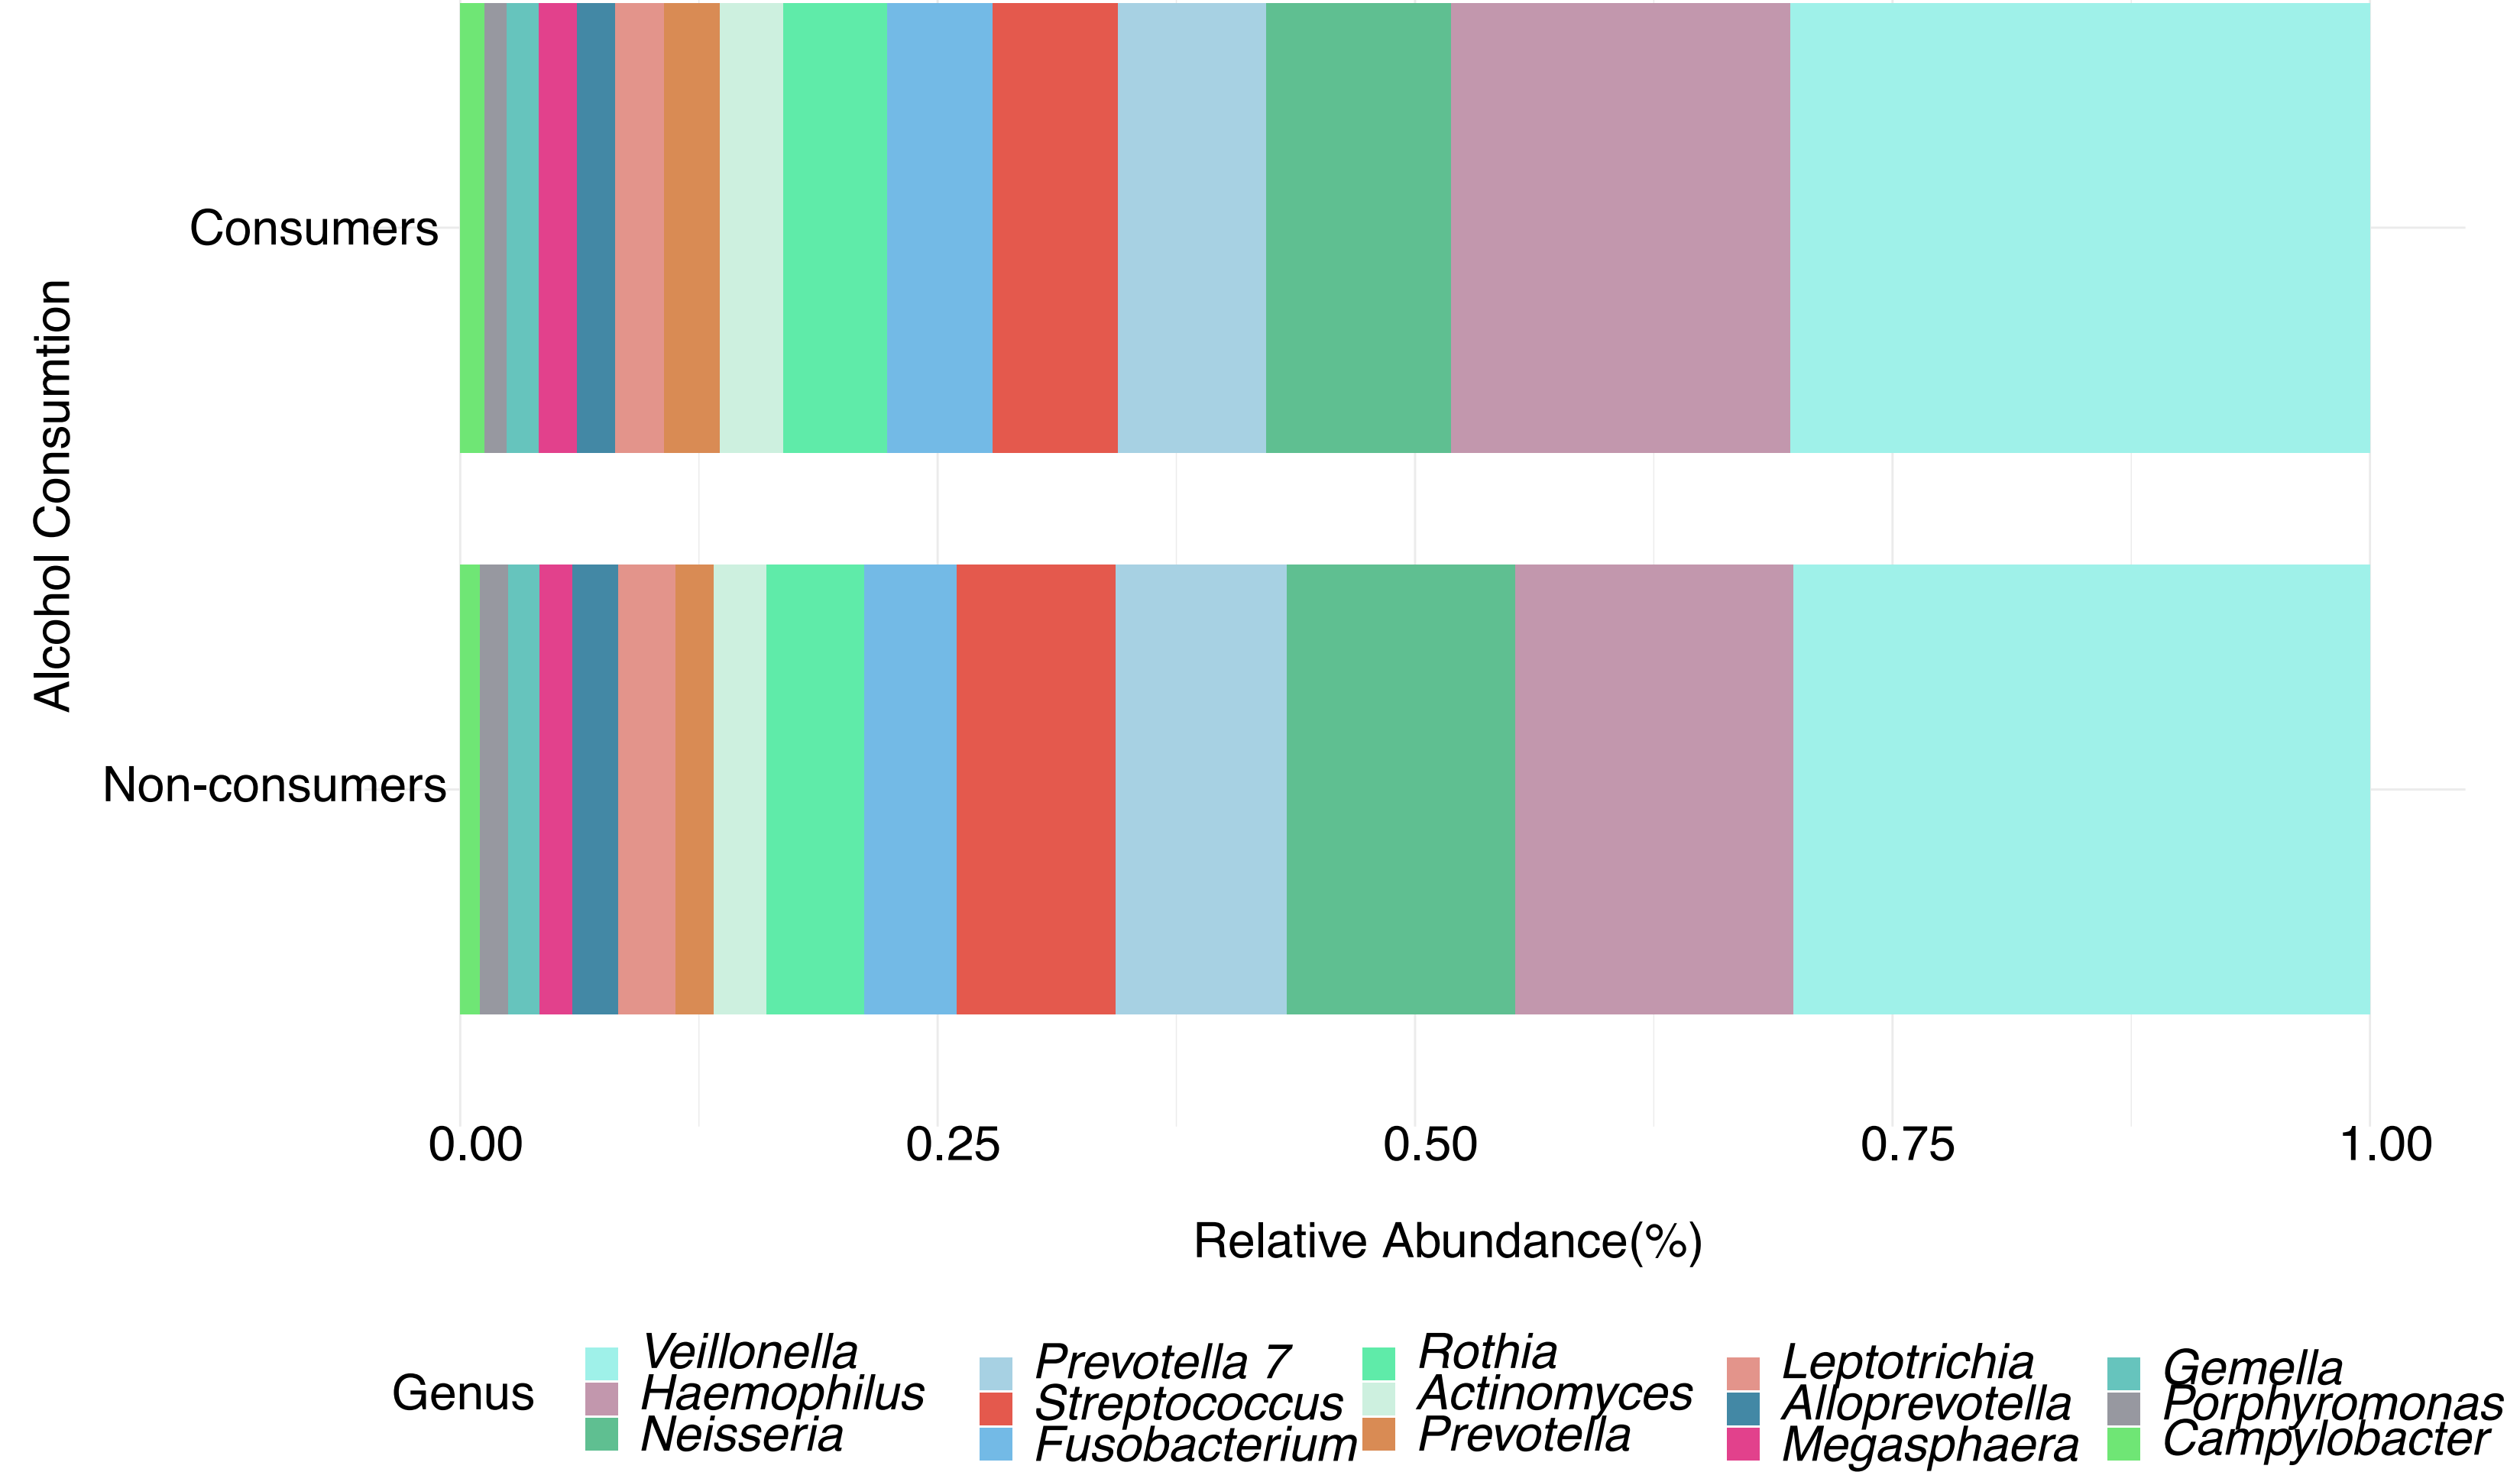

Supplement: Image_2.pdf [file Image_2.pdf]
